# Supplementary material
Source: MDPI journal article supplement (https://www.mdpi.com/2673-3293/2/3/27)

## The reduction of Cd(II) ions in presence of tetraethylammonium cations

J. Torrent-Burgués

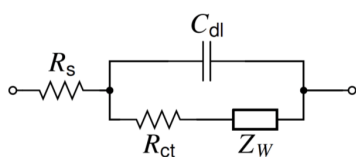

Scheme S1. Randles' circuit:  $Z_w$  is the Warburg element,  $R_{ct}$  is the charge transfer resistance,  $R_s$  is the electrolyte resistance (ohmic resistance) and  $C_{dl}$  is the capacitance of the double layer.

Fig S1. Polarograms for Cd(II) in presence of TEA in 0.55 m perchloric acid solutions. TEA concentrations (mM): 0 (orange), 0.75 (blue), 2 (green), 5 (grey), 10 (red), 20 (yellow).

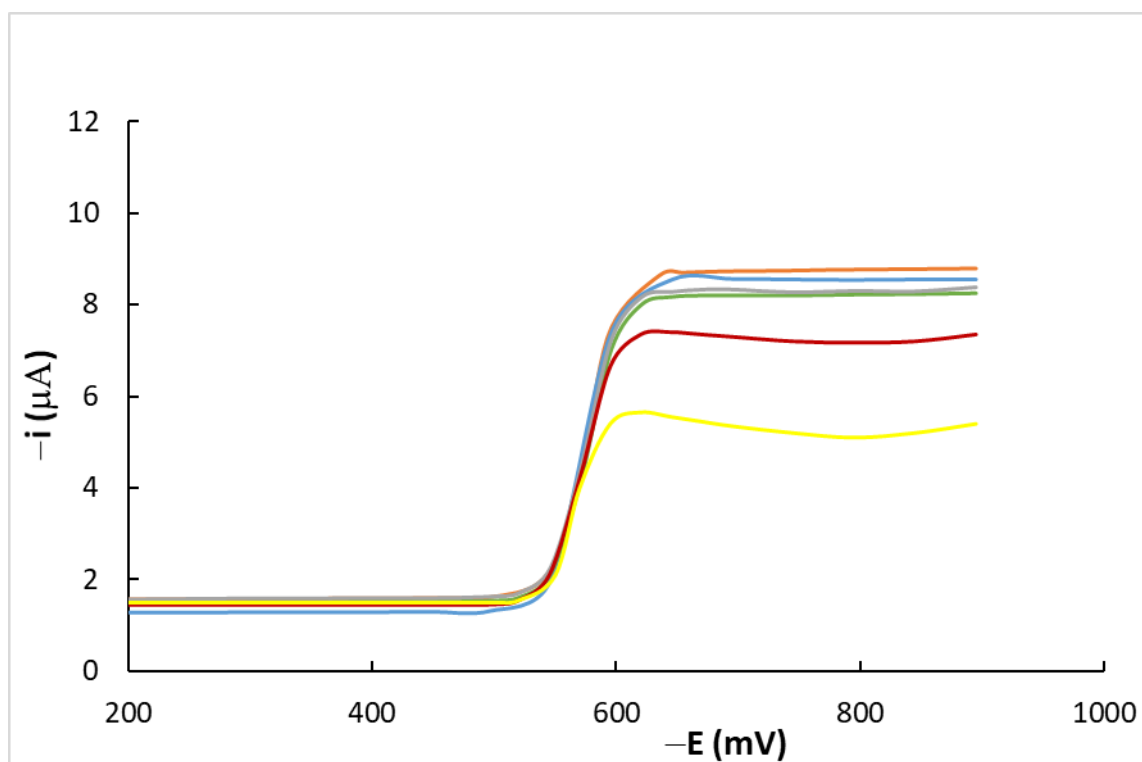

Figure S2. Plot of  $\log(i/(i_d-i))$  vs E for Cd(II) in 0.55 m perchloric acid solution.

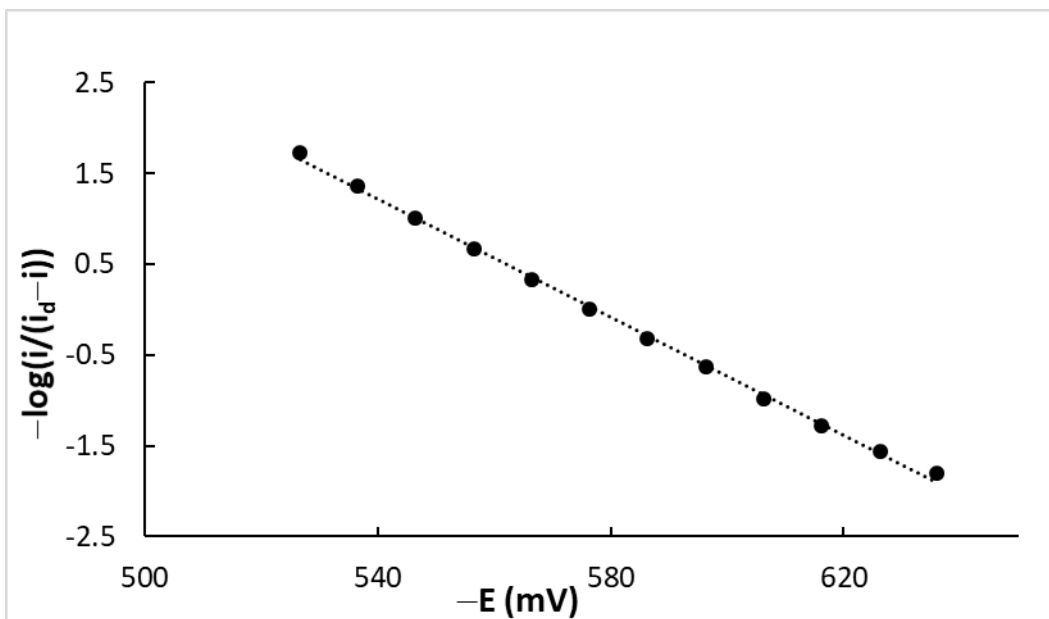

Figure S3. Plot of Warburg coefficient  $\sigma$  vs E at different TEA concentrations. TEA concentrations (mM): 0 (orange), 0.75 (grey), 2 (yellow), 5 (blue), 10 (green).

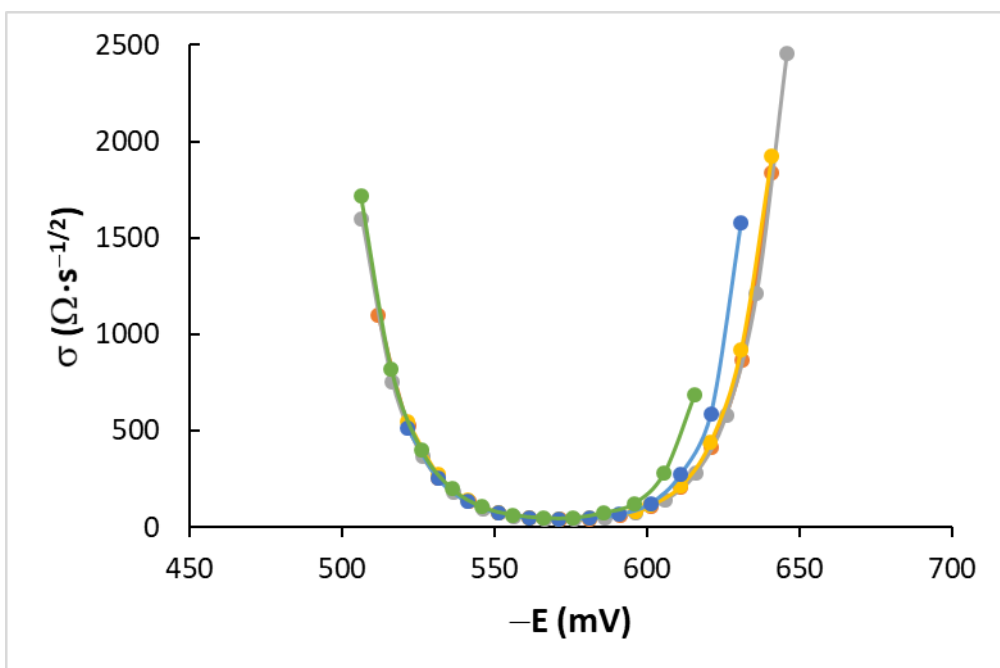

Figure S4. Plot of the irreversibility quotient  $p'$  vs  $E$  at different TEA concentrations. TEA concentrations (mM): 0 (orange), 0.75 (grey), 2 (yellow), 5 (blue), 10 (green).

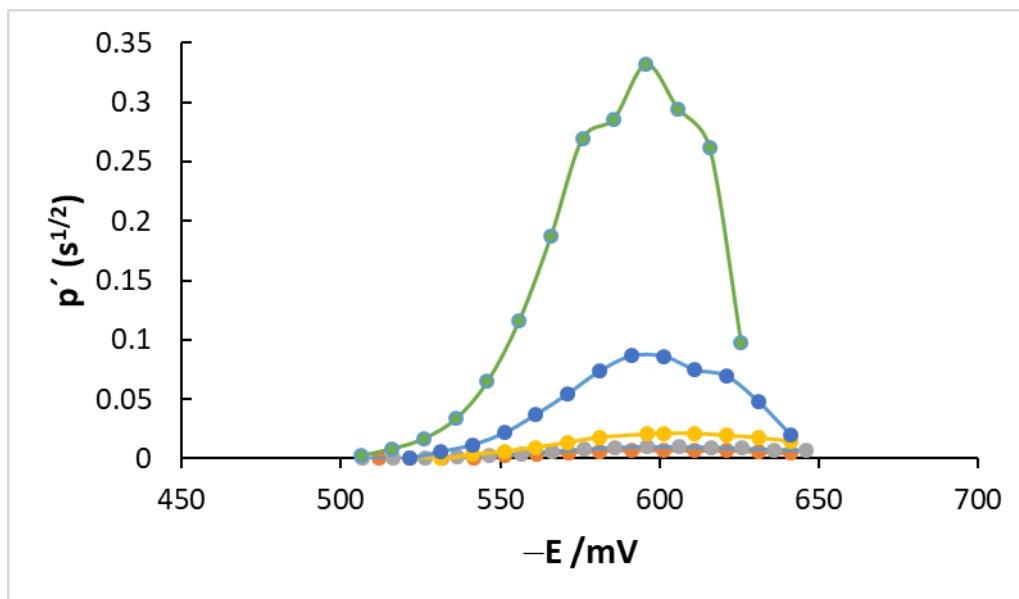

Figure S5. Plot of  $-\ln K$  (obtained from  $p'$  values) vs  $E$  at different TEA concentrations (mM): 0 (green), 0.75 (blue), 2 (yellow), 5 (grey), 10 (orange).

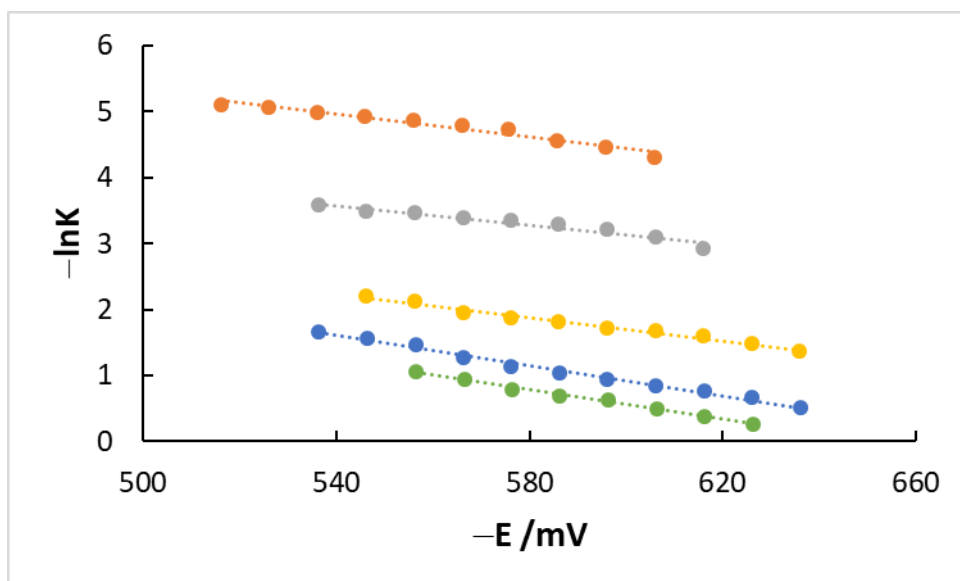

Figure S6. Plot of  $-\ln K_t$  vs  $E\Phi_{-2}$  at different TEA concentrations (mM): 0 (green), 0.75 (blue), 2 (yellow), 5 (grey), 10 (orange).

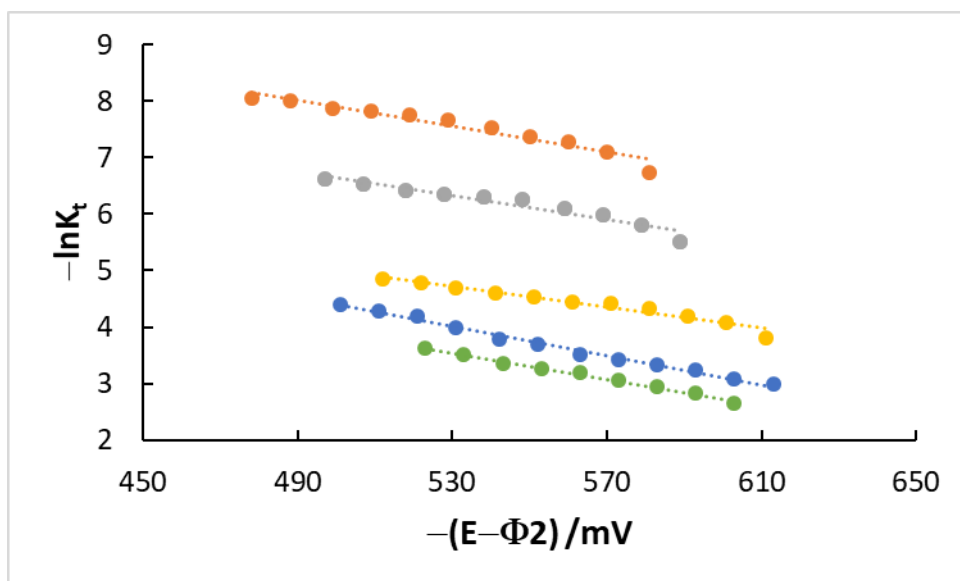

Figure S7. Plot of  $-\ln K_t$  vs  $\ln(1-\theta)$ , for different values of  $E\Phi_{-2}$  (mV): -500 (orange), -520 (blue), -540 (grey), -560 (yellow), -580 (red), -600 (green).

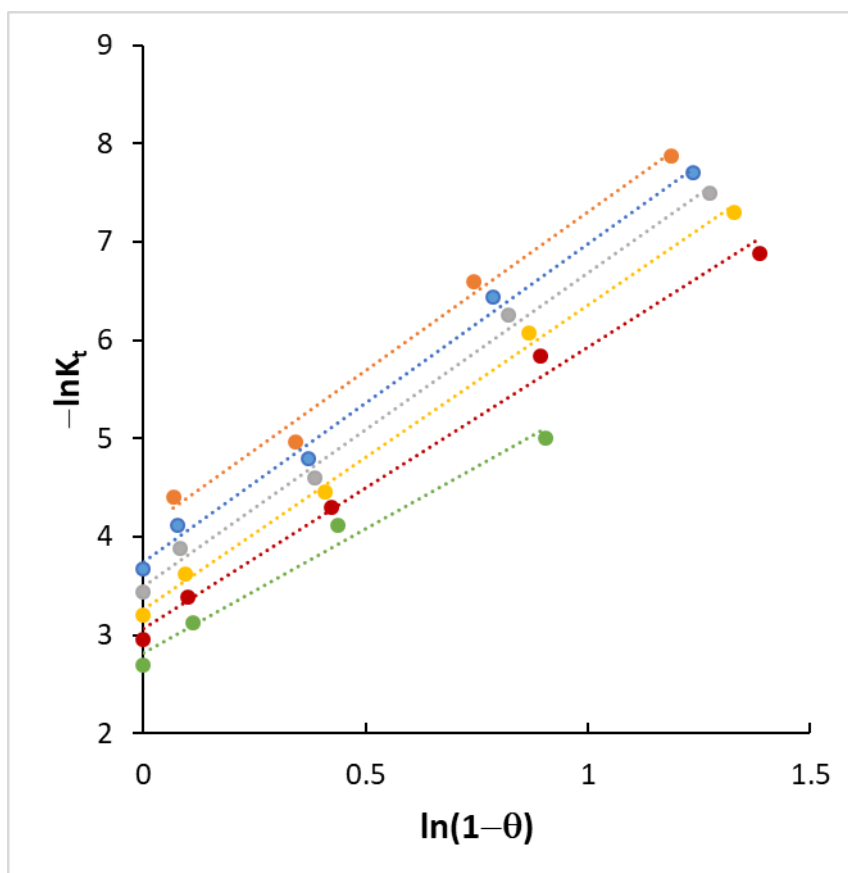

Figure S8. Plot of  $-\ln K$  vs  $\theta$  (blue) and plot of  $-\ln(K/(1-\theta))$  vs  $\theta$  (orange), at  $E_{\Phi-2-} = 520$  mV.

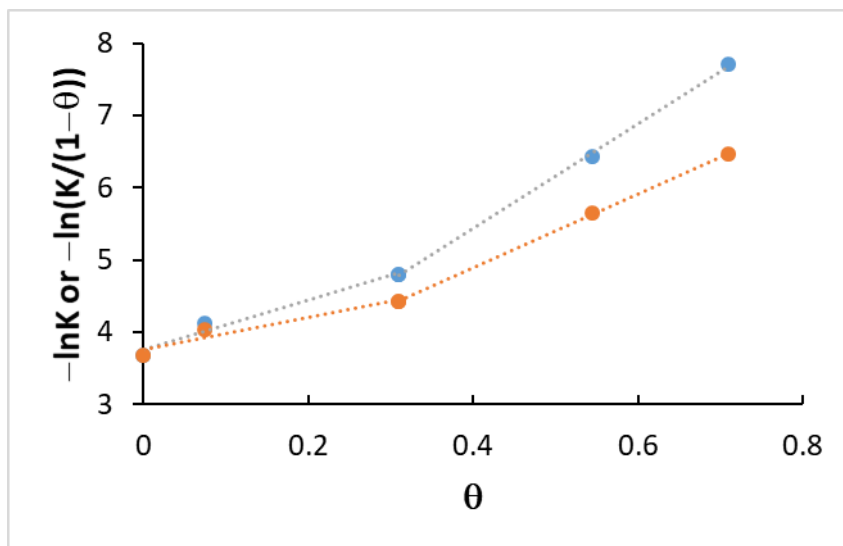

Supplement: s1 [file s1]
